# Supplementary material for: From Nano-Crystals to Periodically Aggregated Assembly in Arylate Polyesters—Continuous Helicoid or Discrete Cross-Hatch Grating?
Source: MDPI journal article supplement (doi:10.3390/nano13061016), 2023-03-11
Supplement: s1 [file s1]

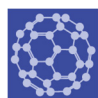

## Article

# From Nano-Crystals to Periodically Aggregated Assembly in Arylate Polyesters—Continuous Helicoid or Discrete Cross-Hatch Grating?

Cheng-En Yang <sup>1</sup>, Selvaraj Nagarajan <sup>1</sup>, Widyantari Rahmayanti <sup>1</sup>, Chean-Cheng Su <sup>2</sup> and Eamor M. Woo <sup>1,\*</sup>

<sup>1</sup> Department of Chemical Engineering, National Cheng Kung University, No. 1, University Road, Tainan 701-01, Taiwan

<sup>2</sup> Department of Chemical and Materials Engineering, National University of Kaohsiung, No. 700, Kaohsiung University Rd., Nan-Tzu Dist., Kaohsiung 811-48, Taiwan

\* Correspondence: emwoo@mail.ncku.edu.tw; Tel.: +886-2757575 (ext. 62670)

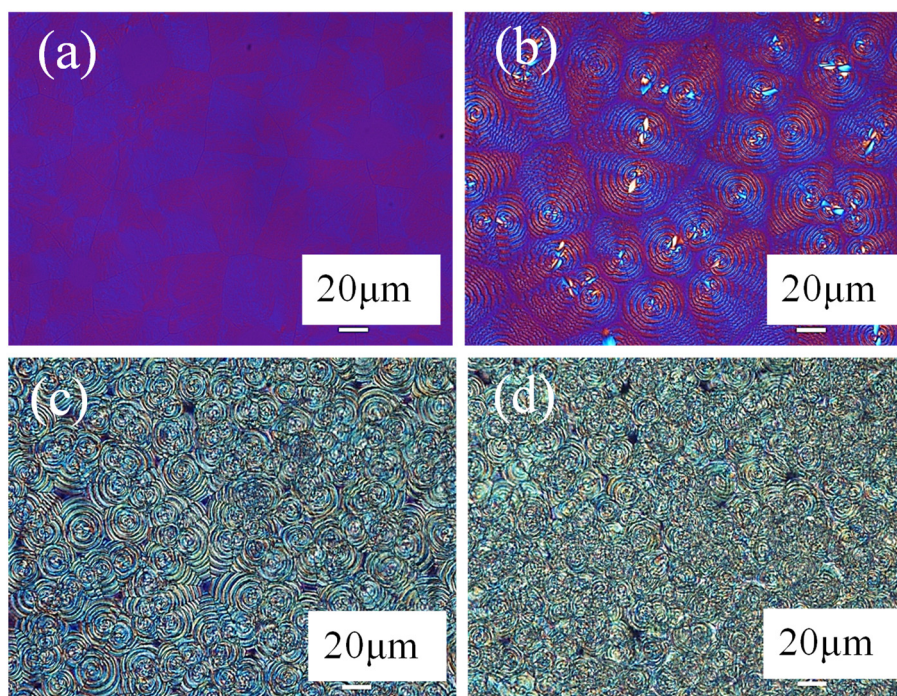

**Figure S1.** Double-birefringence ring bands in PDT spherulites of increasing film thickness: (a) 300–500 nm by spin-casting, (b) 3–5  $\mu\text{m}$ , (c) 7–10  $\mu\text{m}$ , (d) 15–20  $\mu\text{m}$ , all crystallized at  $T_c = 90^\circ\text{C}$ .

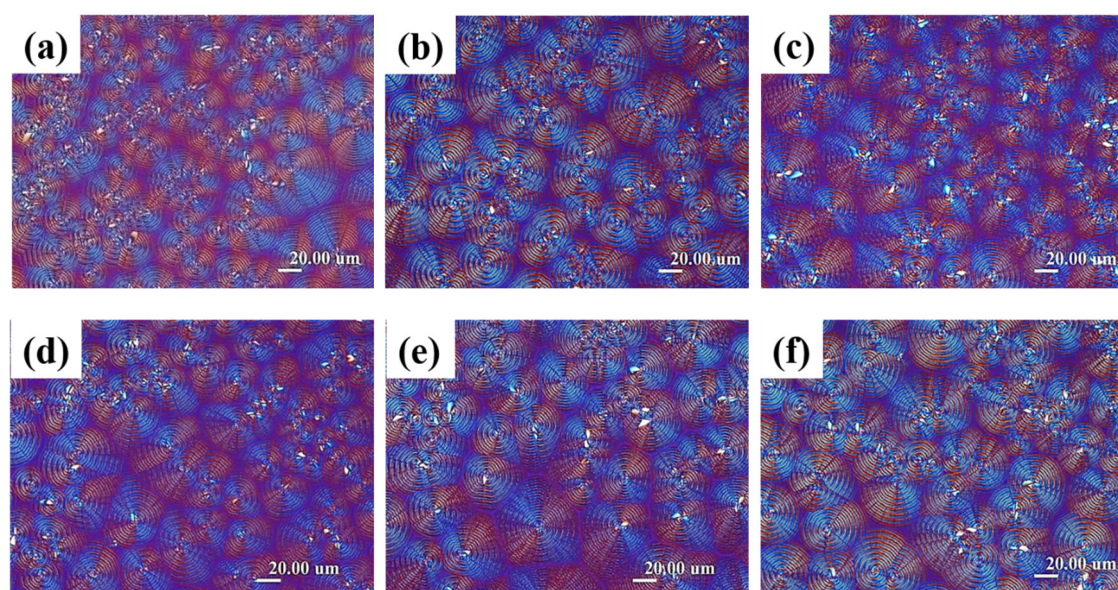

**Figure S2.** POM micrographs for birefringent-banded spherulites of neat PDT melt-crystallized at  $T_c = 95^\circ\text{C}$  with specimens held at  $T_{\text{max}}$  ( $165^\circ\text{C}$ ) for different times ( $t_{\text{max}}$ ): (a) 1min, (b) 15min, (c) 30min, (d) 60min, (e) 90min, and (f) 120 min. [All film thickness kept at ca. 2–3  $\mu\text{m}$ ].
